# Supplementary material for: On the road to universal coverage of postnatal care: considerations for a targeted postnatal care approach for at-risk mother–baby dyads in low-income and middle-income countries informed by a consultation with global experts
Source: PubMed Central journal article supplement (PMC9198691; doi:10.1136/bmjopen-2021-058408), 2022-06-14
Supplement: bmjopen-2021-058408.draft_revisions.pdf [file bmjopen-2021-058408.draft_revisions.pdf]

# BMJ Open

BMJ Open is committed to open peer review. As part of this commitment we make the peer review history of every article we publish publicly available.

When an article is published we post the peer reviewers' comments and the authors' responses online. We also post the versions of the paper that were used during peer review. These are the versions that the peer review comments apply to.

The versions of the paper that follow are the versions that were submitted during the peer review process. They are not the versions of record or the final published versions. They should not be cited or distributed as the published version of this manuscript.

BMJ Open is an open access journal and the full, final, typeset and author-corrected version of record of the manuscript is available on our site with no access controls, subscription charges or pay-per-view fees (<http://bmjopen.bmj.com>).

If you have any questions on BMJ Open's open peer review process please email [info.bmjopen@bmj.com](mailto:info.bmjopen@bmj.com)

# BMJ Open

## On the road to universal coverage of postnatal care: Considerations for a targeted approach for at-risk mother- baby dyads informed by an expert consultation

|                               |                                                                                                                                                                                                                                                      |
|-------------------------------|------------------------------------------------------------------------------------------------------------------------------------------------------------------------------------------------------------------------------------------------------|
| Journal:                      | <i>BMJ Open</i>                                                                                                                                                                                                                                      |
| Manuscript ID                 | bmjopen-2021-058408                                                                                                                                                                                                                                  |
| Article Type:                 | Original research                                                                                                                                                                                                                                    |
| Date Submitted by the Author: | 17-Oct-2021                                                                                                                                                                                                                                          |
| Complete List of Authors:     | Muriuki, Angela; Save the Children, Yahner, Melanie; Save the Children Federation Inc, Global Health Kiragu, Michael; Adroitiz Consultants de Graft-Johnson, Joseph; Save the Children Federation Inc IZULLA, PRESTON; Adroitiz Consultants Limited, |
| Keywords:                     | Health policy < HEALTH SERVICES ADMINISTRATION & MANAGEMENT, Quality in health care < HEALTH SERVICES ADMINISTRATION & MANAGEMENT, Public health < INFECTIOUS DISEASES, Maternal medicine < OBSTETRICS, Community child health < PAEDIATRICS         |
|                               |                                                                                                                                                                                                                                                      |

SCHOLARONE™  
Manuscripts

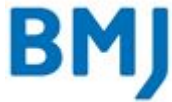

I, the Submitting Author has the right to grant and does grant on behalf of all authors of the Work (as defined in the below author licence), an exclusive licence and/or a non-exclusive licence for contributions from authors who are: i) UK Crown employees; ii) where BMJ has agreed a CC-BY licence shall apply, and/or iii) in accordance with the terms applicable for US Federal Government officers or employees acting as part of their official duties; on a worldwide, perpetual, irrevocable, royalty-free basis to BMJ Publishing Group Ltd ("BMJ") its licensees and where the relevant Journal is co-owned by BMJ to the co-owners of the Journal, to publish the Work in this journal and any other BMJ products and to exploit all rights, as set out in our [licence](#).

The Submitting Author accepts and understands that any supply made under these terms is made by BMJ to the Submitting Author unless you are acting as an employee on behalf of your employer or a postgraduate student of an affiliated institution which is paying any applicable article publishing charge ("APC") for Open Access articles. Where the Submitting Author wishes to make the Work available on an Open Access basis (and intends to pay the relevant APC), the terms of reuse of such Open Access shall be governed by a Creative Commons licence – details of these licences and which [Creative Commons](#) licence will apply to this Work are set out in our licence referred to above.

Other than as permitted in any relevant BMJ Author's Self Archiving Policies, I confirm this Work has not been accepted for publication elsewhere, is not being considered for publication elsewhere and does not duplicate material already published. I confirm all authors consent to publication of this Work and authorise the granting of this licence.

1  
2  
3 1 **On the road to universal coverage of postnatal care: Considerations for a**  
4 **targeted approach for at-risk mother-baby dyads informed by an expert**  
5 **consultation**  
6  
7  
8  
9

10 4 Muriuki, Angela<sup>1</sup>

11 5 Yahner, Melanie<sup>2</sup>

12 6 Kiragu, Michael<sup>3</sup>

13 7 De Graft-Johnson, Joseph<sup>2</sup>

14 8 Izulla, Preston<sup>3</sup>

15 9  
16 10 <sup>1</sup> Save the Children, Kenya

17 11 <sup>2</sup> Save the Children, United States

18 12 <sup>3</sup> Adroitiz Consultants Limited, Kenya  
19 13

20 14 **Correspondence to:**

21 15 Full name: Dr Angela W Muriuki

22 16 Mailing address: Save the Children, East and Southern Africa Regional Office, 2<sup>nd</sup> Floor ABC  
23 17 Place, Waiyaki Way, Westlands.

24 18 P.O Box 19423 - 202, Nairobi, Kenya

25 19 Email: amuriuki@savechildren.org

26 20 Phone: +254 71 109 00 00  
27 21

28 22 Word count: 3673

29 23 References: 27  
30 24

31 24 **Abstract:**

32 25 **Introduction:** The potential of timely, quality postnatal care (PNC) to reduce maternal and  
33 26 newborn mortality and to advance progress toward Universal Health Coverage (UHC) is well-  
34 27 documented. Yet, in many low- and middle-income countries, coverage of PNC remains low.  
35 28 Risk-stratified approaches can maximize limited resources by targeting mother-baby dyads  
36 29 meeting the evidence-based risk criteria which predict poor postnatal outcomes.

37 30 **Objectives:** To review evidence-based risk criteria for identification of at-risk mother-baby  
38 31 dyads, drawn from a literature review, and to identify key considerations for their use in a risk-  
39 32 stratified PNC approach.

40 33 **Design/setting/participants:** A virtual, semi-structured group discussion was conducted with  
41 34 maternal and newborn health experts on Zoom™. Participants were identified through  
42 35 purposive sampling based on content and context expertise.

1  
2  
3 36 **Results:** Seventeen experts, (5 male, 12 female), drawn from policymakers, implementing  
4 37 agencies and academia participated and surfaced several key themes. The identified risk  
5 38 factors are well known necessitating accelerated efforts to address underlying drivers of risk.  
6 39 Risk-stratified PNC approaches complement broader UHC efforts by providing an equity lens  
7 40 to identify the most vulnerable mother-baby dyads. However, these should be layered on  
8 41 efforts to strengthen PNC service provision for all mothers and newborns. Risk factors should  
9 42 comprise context relevant, operationalizable, clinical and non-clinical factors. Even with rising  
10 43 coverage of facility delivery, targeted postnatal home visits still complement facility-based PNC.  
11 44 **Conclusion:** Risk-stratified PNC efforts must be considered within broader health systems  
12 45 strengthening efforts. Implementation research at the country level is needed understand  
13 46 feasibility and practicality of clinical and non-clinical risk factors and identify unintended  
14 47 consequences.

## 23 48 **Article summary**

### 26 **Strengths and limitations of this study**

- 28 • A major strength of this study is the depth and breadth of expertise of the participants  
29 in PNC, each bringing a combination of clinical, research, policy, and  
30 implementation skills across multiple low-and-middle-income countries.
- 31 • The study explored a critical area of maternal and newborn health where limited  
32 evidence exists, highlighting the role of targeted PNC within the current UHC context  
33 and its operationalization.
- 34 • However, the consultation did not include experts representing Ministries of Health  
35 or other government stakeholders as ultimate custodians of a targeted PNC  
36 approach.
- 37 • In addition, nearly all experts came from a clinical background, which shaped  
38 perspectives shared.
- 39 • The discussion platform did not allow for confidentiality, which could have led to  
40 social desirability bias.

## 49 Introduction

50 Approximately 66% of maternal deaths and 75% of neonatal deaths occur within the first week  
51 after delivery.<sup>1</sup> WHO recommends postnatal care (PNC) at a facility, within 24 hours after birth,  
52 regardless of place of birth, observation within a facility for at least 24 hours after delivery, and  
53 early postnatal home visits by community health workers (CHWs) to complement facility-based  
54 PNC.<sup>2</sup> Efforts to expand coverage of quality, timely, equitable PNC services to all mothers and  
55 their newborns directly contribute to the achievement of the 3<sup>rd</sup> Sustainable Development Goal  
56 overall, including to target 3.8, which relates to the attainment of Universal Health Coverage  
57 (UHC).<sup>3,4</sup>

58 Despite an increase in facility delivery, PNC coverage in many low- and middle-income  
59 countries (LMICs) remains below 50%.<sup>5</sup> In many LMICs, observation within a facility for the  
60 recommended 24 hours after delivery is challenging. This is in part due to pressure from  
61 families to leave after an uncomplicated delivery, lack of staffing and infrastructure for inpatient  
62 care, facility opening and closing times and a significant proportion of home deliveries.<sup>6,7</sup>

63 Evidence from LMICs with high newborn mortality rates demonstrates that early, quality  
64 postnatal home visits, within 72 hours after birth, can reduce newborn deaths by between 30-  
65 61% through support for healthy postnatal practices and early identification of danger signs  
66 and referral.<sup>8</sup> Yet, in many LMICs, the CHW cadres responsible for conducting home visits are  
67 under-resourced and inadequately trained, supervised, and remunerated.<sup>9</sup> Where high  
68 coverage of postnatal home visits is difficult to achieve due to these challenges, as in most  
69 LMICs, evidence demonstrates benefit in identifying and providing postnatal home visits to  
70 mother – baby dyads who face a higher risk of poor outcomes.<sup>10</sup>

71 Risk-stratified PNC approaches aim to identify and prioritize at-risk mother-baby dyads at the  
72 facility and at home for early postnatal home visits using evidence-informed criteria to identify  
73 those at risk of an adverse outcome.<sup>11,12</sup> Using these criteria, health providers categorize  
74 mother-baby dyads based on risk and proactively create client-specific care plans.<sup>13</sup> While  
75 criteria can be clinical (e.g., medical conditions and complications) or nonclinical (e.g.,  
76 sociodemographic, household, environmental factors), most risk stratification efforts have  
77 used clinical criteria, and most have focused on risk identification in pregnancy.<sup>14,15</sup>

78 Evidence from other fields of medicine has shown that a narrow focus using a risk-stratified  
79 approach could lead to unintended negative consequences including missing clients with no  
80 identifiable risk factors and could create room for stigmatization.<sup>16,17</sup> Thus, it is crucial to layer

1  
2  
3 81 the approach on, and integrate it into, existing quality improvement and UHC efforts aiming to  
4  
5 82 provide quality, timely PNC for all mothers and their newborns.  
6

7 83 To inform the development and implementation of this approach, an iterative scoping literature  
8  
9 84 review to identify risk criteria for use and an expert consultation were conducted. This paper  
10  
11 85 presents the findings and recommendations from the expert consultation; findings from the  
12  
13 86 scoping review will be published separately.  
14

## 15 87 **Methodology**

16  
17 88 To gain a better understanding of the identification and use of risk criteria in the provision of  
18  
19 89 PNC services, a qualitative approach using a semi-structured virtual group discussion was  
20  
21 90 used. A team of maternal and newborn health (MNH) experts, drawn from academia,  
22  
23 91 implementation partners and donors, were invited for a facilitated virtual expert consultation in  
24  
25 92 April 2021. Participants were selected through purposive sampling based on their ability to  
26  
27 93 provide in-depth and detailed information on the subject matter (PNC) and context (LMICs)  
28  
29 94 due to their experience and expertise. The participants were contacted via email. The  
30  
31 95 consultation aimed to:

- 30 96 1. Review key risk factors, drawn from the literature review, for use at service delivery  
31  
32 97 points (facility, community) to identify at-risk mother-baby dyads.
- 33 98 2. Identify key considerations to prioritize risk factors and operationalize a risk-stratified  
34  
35 99 PNC approach.

36 100 A discussion guide was developed in line with the two key objectives, pretested with an MNH  
37  
38 101 expert who was not part of the consultation and used to facilitate the meeting. The consultation  
39  
40 102 was held on Zoom™ for ninety minutes and facilitated by two trained researchers who were  
41  
42 103 not known to the participants. In addition to the researchers and participants, there were two  
43  
44 104 observers, one note-taker and one person managing the virtual meeting logistics.

45 105 Since the discussion aimed to seek the experts' opinions on a subject matter rather than  
46  
47 106 information on the experts themselves, it was deemed to be non-human subjects research  
48  
49 107 and therefore did not require ethical approval. However, verbal consent was sought from the  
50  
51 108 participants to record the proceedings and use the recordings while ensuring that all  
52  
53 109 participant information was de-identified. Experts were given the option to opt out of the  
54  
55 110 recorded session and those who participated provided consent.

56 111 The initial emerging themes were identified during the virtual discussion and summarised at  
57  
58 112 the end of the consultation by the facilitators and one of the observers. The themes were  
59  
60 113 shared with the experts via email to elicit any additional reflections. Data saturation was not

1  
2  
3 114 discussed. The audio transcript generated by Zoom™ was used for data analysis with the  
4  
5 115 audio recording used to correct any errors in the transcript. A deductive approach was used  
6  
7 116 to code the data along the initial themes and to assess for any new emerging themes after  
8  
9 117 which thematic analysis was conducted. Further exploration of the initial themes and new  
10  
11 118 emerging themes was conducted by the full research team.

## 12 119 **Findings**

13  
14  
15 120 Of the twenty-one invited MNH experts, seventeen participated in the consultation. Five of the  
16  
17 121 participants were male. For two of the non-participants, the reason given was unavailability  
18  
19 122 during the identified time slot due to prior commitments while one was on leave and was not  
20  
21 123 able to participate. Two did not respond to the invite. The findings are presented along the key  
22  
23 124 themes that emerged from the data.

### 24 125 **1. Reflection on risk factors identified from the literature review**

25  
26 126 The risk factors identified from the iterative, scoping literature review were presented for the  
27  
28 127 experts to reflect on and to identify additional factors based on their research and experience.  
29  
30 128 The scoping review focused on population-based studies and excluded hospital-based studies  
31  
32 129 and therefore the criteria identified were non-clinical rather than the clinical risk factors  
33  
34 130 traditionally used to screen for risk.

35  
36 131 An adapted version of the Mosley and Chen framework was used for the scoping review.<sup>18</sup> In  
37  
38 132 the framework, distant factors are the broader socioeconomic factors at individual, household,  
39  
40 133 or community level such as education, wealth status and residence. These act through the  
41  
42 134 proximate causes that are primarily bio-behavioural factors related to the mother and/or  
43  
44 135 neonate such as maternal age, birthweight and utilization of health services that are more  
45  
46 136 directly linked to observed clinical manifestations such as infection or bleeding which led to  
47  
48 137 death.

#### 47 **Textbox 1: Factors associated with poor outcomes for mothers and newborns in the** 48 **postnatal period**

49  
50 Proximate factors include maternal age (<20, >35), primiparity and grand multiparity, shorter birth  
51  
52 intervals, first order/rank neonates, male neonates, birth weight (smaller and larger than average),  
53  
54 multiple gestation, previous history of death of child aged less than 5 years, and lack of or  
55  
56 inadequate antenatal care

57  
58 Distant factors include low levels of parental education (lower than primary level education),  
59  
60 parental employment (no employment or informal employment), rural residence, low household  
income, use of solid fuels and lack of clean water



1  
2  
3 138 According to the experts, the risk factors presented have been known to the MNH community  
4  
5 139 for decades, yet they still played a significant role in influencing maternal and neonatal  
6  
7 140 outcomes in the postnatal period. This raised the importance of expanding initiatives that  
8  
9 141 address and eliminate these risk factors, such as promoting female education, economic  
10  
11 142 empowerment and addressing factors that lead to early childbearing including child marriage,  
12  
13 143 in addition to applying them for screening purposes.

14 144 *'These require generic interventions so some of the interventions and approaches for*  
15 145 *those risk drivers are not restricted or limited to the specific risk periods that we are*  
16 146 *taught, and we have spoken about. There are things that can be part of broad*  
17 147 *packages of care and just ensuring that you have delivery platforms that can address*  
18 148 *them.'* **Participant 13, M.**

19  
20  
21  
22 149 Additionally, they identified the role of broader, emerging issues such as climate change,  
23  
24 150 conflict, displacement, and disease outbreaks and their resultant effect in aggravating the  
25  
26 151 proximate and distant risk factors which pushes a larger proportion of mother-baby dyads into  
27  
28 152 the risk categories.

29  
30 153 *'Conflict is one that jumps out to me. Forty percent of the current global burden of*  
31 154 *maternal newborn adverse outcomes, from our conservative estimation, are related*  
32 155 *conflicts settings including populations on the move. The risks [in these settings] are*  
33 156 *very different to the way we look at the those in stable circumstances.'* **Participant 13,**  
34  
35 157 **M.**

36  
37  
38  
39 158 **2. Key considerations for the prioritization of risk factors and operationalization of a risk-**  
40 159 **stratified PNC approach**

41  
42 160  
43  
44 161 **a) Framing risk-stratified PNC approaches in the context of universal health coverage**

45  
46 162 Achieving UHC for PNC means providing quality, timely, accessible, equitable services for all  
47  
48 163 mother-baby dyads, regardless of place of birth. Thus, it is critical to understand how a PNC  
49  
50 164 approach that prioritises a sub-set of mothers and babies contributes to—or detracts from—  
51  
52 165 these aims. There were mixed reactions from the participants on the role of the risk-stratified  
53  
54 166 PNC approaches within the context of achieving PNC coverage for all.

55 167 *'We've been wondering whether focused approach and risk-stratified approach for the*  
56 168 *babies at most risk would be a more efficient way of doing it because our universal*  
57  
58 169 *approach as you know, has been very challenging. It would be important to discuss*  
59  
60

1  
2  
3 170 *this risk stratified approach but at the same time, you know balancing the universal*  
4 171 *approach, I think, somehow being able to do both will be important.'* **Participant 3, F.**  
5  
6

7 172 However, the experts agreed that the journey towards achieving UHC is incremental and  
8 173 equity-focused, creating opportunities for risk-stratified PNC approaches that identify and  
9 174 prioritise those already facing poorer outcomes.

10  
11  
12  
13 175 A risk-stratified PNC approach still relies on a strengthened health system that can provide  
14 176 optimal PNC services for all mothers and their newborns. According to participants, a risk-  
15 177 stratified approach would require strengthened provider capacity in PNC; adequate supply of  
16 178 essential medicines and equipment; strong referral systems including community follow-up;  
17 179 timely, reliable, quality data for risk screening; functional monitoring systems to assess  
20 180 functionality of the risk-stratified PNC approach and the provision of respectful, dignified care.

21  
22  
23 181 *'If you are looking at this risk factor I go back to the skills. Do they know how to identify*  
24 182 *this woman who is at risk, do they know how to deal with a woman who is at risk?'*  
25 183 **Participant 15, F.**  
26  
27  
28

29 184 *'There are so many things that's tied to it [risk screening] like data to screen and to*  
30 185 *track morbidity and outcomes....and then the women's experience of care, and often*  
31 186 *that's forgotten...'* **Participant 12, F.**  
32  
33  
34

35 187 *I was thinking, one of the things that needs to be taken into consideration is what exists*  
36 188 *in terms of the community health system...so that probably is going to guide us in what*  
37 189 *can be done in terms of approaches.'* **Participant 6, F.**  
38  
39  
40

41 190 One expert emphasised the need for robust data for accurate screening and outcome tracking  
42 191 which could pose a significant challenge to implementation in many LMICs due to weak data  
43 192 systems. The expert noted that data availability also informs the refinement of the approach  
44 193 through a continuous review of those identified as at-risk and those with no identifiable risk  
45 194 factors who later develop complications.

46  
47  
48  
49 195 **b) Framing risk-stratified early postnatal home visits in the context of rising coverage of facility**  
50 196 **delivery**  
51  
52  
53

54 197 A benefit of the risk-stratified PNC approach is to prioritise limited community-level resources  
55 198 towards early postnatal home visits for at-risk mother-baby dyads. The rising coverage of  
56 199 facility deliveries and the missed opportunities for providing quality early PNC at facility level  
57 200 led to questions on whether a community-based risk-stratified PNC approach was still relevant  
58 201 and if more emphasis ought to be placed on quality PNC at facility level.

202 Despite the rising global coverage of facility delivery, participants noted that a significant  
203 proportion of mothers still deliver at home in many LMICs, and many of those who deliver in a  
204 facility are discharged before the recommended 24 hours. Again, some categories of at-risk  
205 mother-baby dyads such as adolescent mothers or mothers with small and sick newborns will  
206 still require postnatal home visits even with strengthened, quality PNC services at facility level.

207 *'I think, personally, facility delivery is increasing and there are a lot of issues at facility*  
208 *level. I think, ideally, we should focus on improving the quality of services provided to*  
209 *mother and baby at facility level... increasingly I think what we really need is a strategy*  
210 *that addresses quality at the facility.'* **Participant 1, M.**

211 *"I think we are seeing more and more women deliver in the facility, but we are not*  
212 *seeing a reduction in [postnatal] mortality due to quality issues. If we could improve*  
213 *the quality of care during childbirth and have those who are at risk stay longer, we may*  
214 *see a return on investment in saving mothers and newborns lives.'* **Participant 14, F.**

### 215 **c) Selection of risk factors and timing of screening**

216 According to the experts, there is value in using both clinical and non-clinical risk factors in a  
217 screening approach. They, however, noted that the challenges of their operationalization may  
218 be why risk screening approaches have used clinical factors. For example, several of the  
219 factors identified are difficult to use for rapid screening at service delivery point by a health  
220 provider and could create stigma or embarrassment (e.g., household income). Some clinical  
221 risks can also be challenging to use in rapid screening (e.g., body mass index). Selecting both  
222 clinical and non-clinical risks factors based on feasibility of use at service delivery level could  
223 address the challenge.

224 *'And yes, I do agree that, in addition to the clinical aspects of the risk factor, also*  
225 *looking at the other determinants like socio-economic elements that put a baby at risk,*  
226 *I think, are important also to include. Again, balancing all of this, you know so that it's*  
227 *programmable—that is the biggest challenge.'* **Participant 3, F.**

228  
229 *'May I suggest start with a clinical approach defined by context...'* **Participant 13, M.**

230 The targeted PNC approach proposes the assessment of risk after birth. However, some of  
231 the identified risk factors are either already present or manifest during pregnancy. Therefore,  
232 experts emphasised on the importance of conducting the screening during the first contact in  
233 pregnancy to identify and, where possible, address these risk factors as early as possible to  
234 improve outcomes through pregnancy and into the postpartum period.

1  
2  
3 235 **d) Mitigating negative unintended consequences**  
4

5 236 The participants emphasised that every pregnancy is a high-risk event and many mothers and  
6 237 babies who develop complications in the postnatal period lack identifiable risk factors.  
7 238 Therefore, a risk-stratified approach approaches must be nested within PNC strengthening  
8 239 initiatives so that the broader system acts as the safety net that catches those without  
9 240 identifiable risk factors and, thus, do not meet the screening criteria.

10  
11  
12  
13  
14 241 *'Certainly, risk stratification is crucial and being able to identify moms and babies, who*  
15 242 *are more likely to have poor outcomes. I think we also know that sometimes those poor*  
16 243 *outcomes come from nowhere for both the mother and the baby. I feel like we need to*  
17 244 *consider also what a dual strategy is so that there is a specific strategy that deals with*  
18 245 *the mothers and babies who are more at risk and more likely to have those poor*  
19 246 *outcomes. And then, a broader based community strategy that can detect those issues*  
20 247 *that seem to come from nowhere for mothers and babies who do not appear to have*  
21 248 *any risk factors, but then subsequently develop significant issues.'* **Participant 10, F.**

22  
23  
24  
25  
26  
27  
28 249 As one expert noted, improvements in overall quality and use of PNC by all women, including  
29 250 those not identified as at-risk, have been seen in areas where risk-stratified PNC approaches  
30 251 were used, highlighting the potential of a knock-on effect with implications for strengthening  
31 252 PNC for all women. This points towards a potential inherent risk mitigation factor that should  
32 253 be studied further.

33  
34  
35  
36  
37 254 *'What was found in one study is by initially concentrating on that risk stratification that*  
38 255 *indeed it led to improvements in PNC numbers, quality, and content overall, so you*  
39 256 *know again that kind of speaks to the theory of by concentrating on one aspect all*  
40 257 *boats rise...'* **Participant 6, F.**

41  
42  
43  
44 258 **Discussion**  
45

46 259 Timely and quality postnatal care is increasingly recognized as critical for mothers and their  
47 260 newborns. Yet in many LMICs, PNC coverage remains stubbornly low despite increased  
48 261 facility delivery. While prior risk stratification efforts have sought to identify and prioritize at-  
49 262 risk mothers during pregnancy,<sup>19,20</sup> limited efforts have targeted at-risk mother-baby dyads  
50 263 during the postnatal period.<sup>21</sup> The findings of this expert consultation underscore the potential  
51 264 contribution of identifying at-risk mother-baby dyads based on clinical and non-clinical risk  
52 265 criteria to broader UHC efforts and raise key considerations for the operationalization of risk-  
53 266 stratified PNC approaches.

1  
2  
3 267 Given the risk of stigma resulting from labelling mothers and newborns as 'at-risk,' the term  
4 268 'targeted PNC' may be more suitable for real-world application than 'risk stratified PNC' and  
5 269 is thus used throughout this discussion.  
6  
7

8  
9 270 The expert consultation concluded that concurrent efforts are needed to target coverage of  
10 271 PNC to those most at-risk of adverse outcomes, while improving quality of and access to PNC  
11 272 to meet the increasing coverage of facility delivery. Through providing an equity lens to guide  
12 273 systematic identification of those most vulnerable to poor postnatal outcomes, targeted PNC  
13 274 should be considered a contribution—not an alternative—to UHC efforts.  
14  
15  
16

17  
18 275 The expert consultation concluded that targeted PNC should be considered and provided in  
19 276 the presence of certain conditions. First, targeted PNC is only appropriate in the context of  
20 277 efforts to strengthen the timing and quality of facility PNC, including pre-discharge PNC, for all  
21 278 mother-baby dyads. This allows for identification and timely service provision for those who  
22 279 develop complications in the absence of identifiable risk factors. Community-based provider  
23 280 cadres must be sufficiently resourced (sufficient numbers to achieve population coverage) and  
24 281 supported (through training and supportive supervision)<sup>22</sup> to allow for adequate counselling for  
25 282 caregivers on identification of dangers signs and immediate care-seeking, timely identification  
26 283 and outreach to at-risk mother-baby dyads who later develop complications and rapid referral.  
27 284 Second, monitoring systems, which often include limited data related to PNC,<sup>23</sup> must be  
28 285 strengthened allow both timely identification of mother-baby dyads meeting established risk  
29 286 criteria, and proactive tracking, identification, and resolution of any unintended consequences.  
30  
31  
32  
33  
34  
35  
36  
37

38 287 Implementing a targeted PNC approach nested within broader equity-based UHC efforts  
39 288 entails consideration of how limited resources can be most effectively and efficiently targeted  
40 289 to those most likely to benefit. Exploration of several key considerations through robust country  
41 290 learning agendas is needed. First, decisions of which mother-baby dyads should be targeted  
42 291 should be guided by identification of risk factors comprising both clinical and non-clinical  
43 292 predictors of poor outcomes. While clinical risk factors may more feasibly identifiable, evidence  
44 293 demonstrates that non-clinical factors may be equally important to consider; for example,  
45 294 McCarthy et al found that mothers with higher household wealth were more likely to receive a  
46 295 postnatal home visit than women in poorer households.<sup>24</sup> Evidence-based risk criteria for both  
47 296 facility- and community-based providers must be determined with consideration of both  
48 297 contextual relevance and feasibility of operationalization.  
49  
50  
51  
52  
53  
54  
55

56  
57 298 Next are considerations of how to operationalize selected evidence-informed clinical and non-  
58 299 clinical risk factors by facility and community providers. The timing of risk identification merits  
59 300 further consideration (i.e., some factors may be identifiable during pregnancy, while others  
60

1  
2  
3 301 manifest only following delivery). Clear and feasible guidance on actions to be taken for  
4 302 mother-baby dyads meeting risk criteria is needed and must be developed with careful  
5 303 consideration of the implications for provider workload and motivation, client flow, and facility  
6 304 infrastructure capacity. In addition to tailored criteria, the identification mechanisms and  
7 305 associated actions for mother-baby dyads identified to meet risk criteria will need to be  
8 306 differentiated for facility- and community-based providers.

13  
14 307 Increasingly, the role of service quality, including respectful treatment at facilities, is  
15 308 recognised as a factor to initiation and continuation of service use.<sup>25,26</sup> Given the vulnerability  
16 309 of at-risk mother-baby dyads, particularly those with identified non-clinical risks (e.g.,  
17 310 adolescent mothers, those with low socio-economic status), efforts to increase accessibility  
18 311 and ensure respectful care at all levels of the health system are particularly critical elements  
19 312 of broader UHC efforts. Unintended consequences of a targeted PNC approach—positive and  
20 313 negative impacts on the health system and on health outcomes—must be assessed,  
21 314 monitored continuously, and addressed.

27  
28 315 Notably, broader efforts are needed to reduce prevalence of underlying clinical and non-  
29 316 clinical risk factors that contribute to poor maternal and newborn outcomes.<sup>27</sup> Mitigating the  
30 317 non-clinical risk factors will require a multi-sectoral effort beyond the health system. Further  
31 318 efforts are needed to deepen understanding of how issues such as climate change, conflict,  
32 319 displacement, and disease outbreaks may confound the proximate and distant risk factors.

36  
37 320 This consultation has several limitations. The expert consultation invited perspectives of a  
38 321 small number of global and country experts. While care was taken to ensure diversity of  
39 322 experts' sex, organisation affiliation, and country of origin, perspectives of other relevant  
40 323 stakeholders are not represented. Importantly, no experts represented Ministries of Health or  
41 324 other government stakeholders as ultimate custodians of a targeted PNC approach. In  
42 325 addition, nearly all experts came from a clinical background, which shaped perspectives  
43 326 shared. The discussion did not allow for confidentiality, which could have led to social  
44 327 desirability bias.

## 49 328 **Conclusion**

51  
52 329 Targeted community-based PNC approaches, nestled within broader efforts to strengthen  
53 330 quality PNC services including pre-discharge PNC, could improve outcomes for mother-baby  
54 331 dyads most at-risk of morbidity and mortality during the postnatal period. This paper makes  
55 332 the following key points:

- 58 333 ● Efforts are needed to increase coverage of quality, timely PNC to mother-baby dyads  
59 334 most at risk of poor health outcomes in the postnatal period while advancing progress

- 1  
2  
3 335 toward universal coverage of quality PNC. A targeted PNC approach is one way of  
4 achieving this.  
5 336  
6 337 ● Targeted PNC approaches should be considered in tandem with and layered on  
7 complementary efforts aiming to strengthen the coverage, timing, and quality of facility  
8 338 PNC for all mother-baby dyads rather than as stand-alone interventions. This allows  
9 339 for timely identification and provision of care or referral for mother-baby dyads who  
10 340 develop complications without identifiable risk factors.  
11 341  
12 342 ● Evidence-based clinical and non-clinical factors for use to assess risk should be  
13 selected based on key considerations including application to the context and  
14 343 feasibility of operationalization at the targeted service delivery point – facility and/or  
15 344 community.  
16 345  
17 346 ● Context specific evidence is required to deepen insights into the feasibility and  
18 operationalizability of clinical and non-clinical risk factors in a real-world setting;  
19 347 capacity of the health system to support a targeted PNC approach while offering quality,  
20 348 timely PNC services for all mothers and their babies; and unintended consequences  
21 349 (both positive and negative) of a targeted PNC approach.  
22 350  
23 351

### 352 **Author contributions**

353 The authors confirm contribution as follows:

354 **AM** contributed to the design and implementation of the expert consultation,  
355 conceptualization, secondary data analysis and manuscript writing. AM is a clinician,  
356 researcher, and a public health expert with 15 years' experience in maternal, newborn and  
357 adolescent health.

358 **MY** contributed to the design and implementation of the expert consultation,  
359 conceptualization, and manuscript writing. MY is a public health expert and researcher with  
360 expertise in adolescent and youth health including postnatal care for first time adolescent  
361 and young mothers.

362 **MK** contributed to the design and implementation of the expert consultation (including as co-  
363 facilitator for the virtual group discussion), data analysis, and critical review and feedback.  
364 MK is a clinician, public health expert and researcher with 16 years' experience in research,  
365 evaluation, and health policy.

366 **JJ** contributed to the design and implementation of the expert consultation,  
367 conceptualization of the manuscript and critical review and feedback. JJ is a clinician, public  
368 health expert and researcher with over 35 years' experience in maternal and newborn  
369 health.

1  
2  
3 370 **PI** contributed to the design and implementation of the expert consultation (including as co-  
4 371 facilitator for the virtual group discussion), data analysis, and critical review and feedback. PI  
5 372 is a clinician, public health expert and researcher.  
6  
7

### 8 9 373 **Acknowledgements**

10  
11 374 The authors acknowledge the administrative and logistical support provided by Rudo Kashiri  
12 375 and Amy Mangieri from Save the Children throughout the planning and implementation  
13 376 process of the expert consultation.  
14  
15

### 16 17 377 **Funding statement**

18  
19  
20 378 This work was supported by the Bill & Melinda Gates Foundation grant number [OPP1199380].  
21 379 The findings and conclusions contained within are those of the authors and do not necessarily  
22 380 reflect positions or policies of the Bill & Melinda Gates Foundation.  
23  
24

### 25 26 381 **Patient involvement**

27  
28 382 No patients or members of the public were involved in the design, or conduct, or reporting, or  
29 383 dissemination plans of the research.  
30  
31

### 32 33 384 **Conflicts of Interest**

34  
35 385 Having read and understood the [BMJ policy on declaration of interests](#), the authors have no  
36 386 conflict of interest to declare.  
37  
38

### 39 40 387 **Licence**

41  
42 388 The Corresponding Author has the right to grant on behalf of all authors and does grant on  
43 389 behalf of all authors, an exclusive licence (or non-exclusive for government employees) on a  
44 390 worldwide basis to the BMJ Publishing Group Ltd ("BMJ"), and its Licensees to permit this  
45 391 article (if accepted) to be published in The BMJ's editions and any other BMJ products and  
46 392 to exploit all subsidiary rights, as set out in [The BMJ's licence](#).  
47  
48  
49  
50  
51  
52  
53  
54  
55  
56  
57  
58  
59  
60



393 **References**

- 1 World Health Organization. Postnatal care of the mother and newborn [Internet]. Geneva; 2013. Available from: [http://apps.who.int/iris/bitstream/10665/97603/1/9789241506649\\_eng.pdf](http://apps.who.int/iris/bitstream/10665/97603/1/9789241506649_eng.pdf).
- 2 World Health Organization. Postnatal care of the mother and newborn [Internet]. Geneva; 2013. Available from: [http://apps.who.int/iris/bitstream/10665/97603/1/9789241506649\\_eng.pdf](http://apps.who.int/iris/bitstream/10665/97603/1/9789241506649_eng.pdf).
- 3 United Nations. Sustainable Development Goals [Internet]. 2016 [Available from: <https://sustainabledevelopment.un.org/topics/sustainabledevelopmentgoals>].
- 4 Sacks E, Langlois ÉV. Postnatal care: increasing coverage, equity, and quality. *Lancet Glob Health*. 2016 Jul;4(7):e442-3. doi: 10.1016/S2214-109X(16)30092-4. Epub 2016 May 13. PMID: 27185467.
- 5 Victora, CG, Requejo, JH, Barros, AJD, Berman, P, Bhutta, Z, Boerma T. Countdown to 2015: a decade of tracking progress for maternal, newborn, and child survival. *Lancet*, The. 2016;387(10032):1049–59.
- 6 Bashar Mda, Aggarwal A, Pilia M. Factors causing early maternity discharge of uncomplicated normal delivery cases at government health facilities in Northern India: An exploratory study. *J Educ Health Promot* [Internet]. 2020;9(1):198. Available from: <http://www.jehp.net/text.asp?2020/9/1/198/293940>
- 7 Campbell OMR, Cegolon L, Macleod D, Benova L. Length of Stay After Childbirth in 92 Countries and Associated Factors in 30 Low- and Middle-Income Countries: Compilation of Reported Data and a Cross-sectional Analysis from Nationally Representative Surveys. Myers JE, editor. *PLOS Med* [Internet]. 2016 Mar 8;13(3): e1001972. Available from: <https://dx.plos.org/10.1371/journal.pmed.1001972>
- 8 Gogia S, Sachdev HS. Home visits by community health workers to prevent neonatal deaths in developing countries: a systematic review. *Bull World Health Organ* [Internet]. 2010 Sep 1;88(9):658-666B. Available from: <http://www.who.int/bulletin/volumes/88/9/09-069369.pdf>
- 9 Scott, K., Beckham, S.W., Gross, M. et al. What do we know about community-based health worker programs? A systematic review of existing reviews on community health workers. *Hum Resour Health* 16, 39. 2018. <https://doi.org/10.1186/s12960-018-0304-x>
- 10 McPherson R, Hodgins S. Postnatal home visitation: Lessons from country programs operating at scale. *J Glob Health* [Internet]. 2018 Jun;8(1). Available from: <http://jogh.org/documents/issue201801/jogh-08-010422.pdf>
- 11 World Health Organization (WHO). Risk approach for maternal and child health care. In: *World Health Forum*. 1981. p. 413–22.
- 12 Ochejele S, Ijiko E, Obulu M. Assessment of the risk approach in the reduction of maternal mortality in north-central Nigeria. *J West African Coll Surg* [Internet]. 2011;1(2):76–85. Available from: <http://www.ncbi.nlm.nih.gov/pubmed/25452955> <http://www.pubmedcentral.nih.gov/articlerender.fcgi?artid=PMC4170261>
- 13 Mora J, Iturralde MD, Prieto L, Domingo C, Gagnon M-P, Martínez-Carazo C, et al. Key aspects related to implementation of risk stratification in health care systems-the ASSEHS study. *BMC Health*

- Serv Res [Internet]. 2017 Dec 5;17(1):331. Available from: <http://bmchealthservres.biomedcentral.com/articles/10.1186/s12913-017-2275-3>
- 14 Rajbanshi S, Norhayati MN, Nik Hazlina NH. High-risk pregnancies and their association with severe maternal morbidity in Nepal: A prospective cohort study. *PLoS ONE* 15(12): e0244072. 2020 <https://doi.org/10.1371/journal.pone.0244072>
- 15 Patel, A., Prakash, A.A., Pusdekar, Y.V. et al. Detection and risk stratification of women at high risk of preterm birth in rural communities near Nagpur, India. *BMC Pregnancy Childbirth* 17, 311. 2017 <https://doi.org/10.1186/s12884-017-1504-4>
- 16 Garg A, Boynton-Jarrett R, Dworkin PH. Avoiding the unintended consequences of screening for social determinants of health. *JAMA - J Am Med Assoc.* 2016;316(8):813–4.
- 17 Feudtner C, Schall T, Nathanson P, Berry J. Ethical Framework for Risk Stratification and Mitigation Programs for Children With Medical Complexity. *Pediatrics* [Internet]. 2018 Mar 1;141(Supplement 3): S250–8. Available from: <http://pediatrics.aappublications.org/lookup/doi/10.1542/peds.2017-1284J>
- 18 Mosley,W,H and Chen, L C. An analytical framework for the study of child survival in developing countries. *Bull World Health Organ.* 2003;81(2):140–5.
- 19 Patel A, Prakash AA, Pusdekar Y V., Kulkarni H, Hibberd P. Detection, and risk stratification of women at high risk of preterm birth in rural communities near Nagpur, India. *BMC Pregnancy Childbirth.* 2017;17(1).
- 20 Ochejele S, Ijiko E, Obulu M. Assessment of the risk approach in the reduction of maternal mortality in north-central Nigeria. *J West African Coll Surg* [Internet]. 2011;1(2):76–85. Available from: <http://www.ncbi.nlm.nih.gov/pubmed/25452955> <http://www.pubmedcentral.nih.gov/articlerender.fcgi?artid=PMC4170261>
- 21 World Health Organization. Postnatal care of the mother and newborn [Internet]. Geneva; 2013. Available from: [http://apps.who.int/iris/bitstream/10665/97603/1/9789241506649\\_eng.pdf](http://apps.who.int/iris/bitstream/10665/97603/1/9789241506649_eng.pdf).
- 22 WHO. The World Health Report 2008. Primary Health Care - now more than ever, vol. 26. Geneva: World Health Organization, 2008. Available from: [http://www.who.int/whr/2008/whr08\\_en.pdf](http://www.who.int/whr/2008/whr08_en.pdf)
- 23 Neal, S., Channon, A.A., Carter, S. et al. Universal health care and equity: evidence of maternal health based on an analysis of Demographic and Household Survey data. *Int J Equity Health* 14, 56 2015. <https://doi.org/10.1186/s12939-015-0184-9>
- 24 McCarthy KJ, Braganza S, Fiori K, Gbeleou C, Kpakpo V, Lopez A, et al. Identifying inequities in maternal and child health through risk stratification to inform health systems strengthening in Northern Togo. *PLoS ONE* 12(3): e0173445. 2017. <https://doi.org/10.1371/journal.pone.0173445>
- 25 Bohren MA, Vogel JP, Hunter EC, et al. The mistreatment of women during childbirth in health facilities globally: a mixed-methods systematic review. *PLoS Med* 2015; 12: e1001847
- 26 Asefa A. Unveiling respectful maternity care as a way to address global inequities in maternal health. *BMJ Glob Health.* 2021;6(1):e003559. doi:10.1136/bmjgh-2020-003559
- 27 Batist J. An intersectional analysis of maternal mortality in Sub-Saharan Africa: a human rights issue. *J Glob Health.* 2019;9(1):010320. doi:10.7189/jogh.09.010320

## COREQ (CONsolidated criteria for REporting Qualitative research) Checklist

A checklist of items that should be included in reports of qualitative research. You must report the page number in your manuscript where you consider each of the items listed in this checklist. If you have not included this information, either revise your manuscript accordingly before submitting or note N/A.

| Topic                                          | Item No. | Guide Questions/Description                                                                                                                              | Reported on Page No. |
|------------------------------------------------|----------|----------------------------------------------------------------------------------------------------------------------------------------------------------|----------------------|
| <b>Domain 1: Research team and reflexivity</b> |          |                                                                                                                                                          |                      |
| <i>Personal characteristics</i>                |          |                                                                                                                                                          |                      |
| Interviewer/facilitator                        | 1        | Which author/s conducted the interview or focus group?                                                                                                   |                      |
| Credentials                                    | 2        | What were the researcher's credentials? E.g. PhD, MD                                                                                                     |                      |
| Occupation                                     | 3        | What was their occupation at the time of the study?                                                                                                      |                      |
| Gender                                         | 4        | Was the researcher male or female?                                                                                                                       |                      |
| Experience and training                        | 5        | What experience or training did the researcher have?                                                                                                     |                      |
| <i>Relationship with participants</i>          |          |                                                                                                                                                          |                      |
| Relationship established                       | 6        | Was a relationship established prior to study commencement?                                                                                              |                      |
| Participant knowledge of the interviewer       | 7        | What did the participants know about the researcher? e.g. personal goals, reasons for doing the research                                                 |                      |
| Interviewer characteristics                    | 8        | What characteristics were reported about the interviewer/facilitator? e.g. Bias, assumptions, reasons and interests in the research topic                |                      |
| <b>Domain 2: Study design</b>                  |          |                                                                                                                                                          |                      |
| <i>Theoretical framework</i>                   |          |                                                                                                                                                          |                      |
| Methodological orientation and Theory          | 9        | What methodological orientation was stated to underpin the study? e.g. grounded theory, discourse analysis, ethnography, phenomenology, content analysis |                      |
| <i>Participant selection</i>                   |          |                                                                                                                                                          |                      |
| Sampling                                       | 10       | How were participants selected? e.g. purposive, convenience, consecutive, snowball                                                                       |                      |
| Method of approach                             | 11       | How were participants approached? e.g. face-to-face, telephone, mail, email                                                                              |                      |
| Sample size                                    | 12       | How many participants were in the study?                                                                                                                 |                      |
| Non-participation                              | 13       | How many people refused to participate or dropped out? Reasons?                                                                                          |                      |
| <i>Setting</i>                                 |          |                                                                                                                                                          |                      |
| Setting of data collection                     | 14       | Where was the data collected? e.g. home, clinic, workplace                                                                                               |                      |
| Presence of non-participants                   | 15       | Was anyone else present besides the participants and researchers?                                                                                        |                      |
| Description of sample                          | 16       | What are the important characteristics of the sample? e.g. demographic data, date                                                                        |                      |
| <i>Data collection</i>                         |          |                                                                                                                                                          |                      |
| Interview guide                                | 17       | Were questions, prompts, guides provided by the authors? Was it pilot tested?                                                                            |                      |
| Repeat interviews                              | 18       | Were repeat interviews carried out? If yes, how many?                                                                                                    |                      |
| Audio/visual recording                         | 19       | Did the research use audio or visual recording to collect the data?                                                                                      |                      |
| Field notes                                    | 20       | Were field notes made during and/or after the interview or focus group?                                                                                  |                      |
| Duration                                       | 21       | What was the duration of the interviews or focus group?                                                                                                  |                      |
| Data saturation                                | 22       | Was data saturation discussed?                                                                                                                           |                      |
| Transcripts returned                           | 23       | Were transcripts returned to participants for comment and/or                                                                                             |                      |

| Topic                                  | Item No. | Guide Questions/Description                                                                                                        | Reported on Page No. |
|----------------------------------------|----------|------------------------------------------------------------------------------------------------------------------------------------|----------------------|
|                                        |          | correction?                                                                                                                        |                      |
| <b>Domain 3: analysis and findings</b> |          |                                                                                                                                    |                      |
| <i>Data analysis</i>                   |          |                                                                                                                                    |                      |
| Number of data coders                  | 24       | How many data coders coded the data?                                                                                               |                      |
| Description of the coding tree         | 25       | Did authors provide a description of the coding tree?                                                                              |                      |
| Derivation of themes                   | 26       | Were themes identified in advance or derived from the data?                                                                        |                      |
| Software                               | 27       | What software, if applicable, was used to manage the data?                                                                         |                      |
| Participant checking                   | 28       | Did participants provide feedback on the findings?                                                                                 |                      |
| <i>Reporting</i>                       |          |                                                                                                                                    |                      |
| Quotations presented                   | 29       | Were participant quotations presented to illustrate the themes/findings?<br>Was each quotation identified? e.g. participant number |                      |
| Data and findings consistent           | 30       | Was there consistency between the data presented and the findings?                                                                 |                      |
| Clarity of major themes                | 31       | Were major themes clearly presented in the findings?                                                                               |                      |
| Clarity of minor themes                | 32       | Is there a description of diverse cases or discussion of minor themes?                                                             |                      |

Developed from: Tong A, Sainsbury P, Craig J. Consolidated criteria for reporting qualitative research (COREQ): a 32-item checklist for interviews and focus groups. *International Journal for Quality in Health Care*. 2007. Volume 19, Number 6: pp. 349 – 357

**Once you have completed this checklist, please save a copy and upload it as part of your submission. DO NOT include this checklist as part of the main manuscript document. It must be uploaded as a separate file.**

# BMJ Open

**On the road to universal coverage of postnatal care:  
Considerations for a targeted postnatal care approach for  
at-risk mother-baby dyads in low- and middle-income  
countries informed by a consultation with global experts**

|                                 |                                                                                                                                                                                                                                                      |
|---------------------------------|------------------------------------------------------------------------------------------------------------------------------------------------------------------------------------------------------------------------------------------------------|
| Journal:                        | <i>BMJ Open</i>                                                                                                                                                                                                                                      |
| Manuscript ID                   | bmjopen-2021-058408.R1                                                                                                                                                                                                                               |
| Article Type:                   | Original research                                                                                                                                                                                                                                    |
| Date Submitted by the Author:   | 02-Mar-2022                                                                                                                                                                                                                                          |
| Complete List of Authors:       | Muriuki, Angela; Save the Children, Yahner, Melanie; Save the Children Federation Inc, Global Health Kiragu, Michael; Adroitiz Consultants de Graft-Johnson, Joseph; Save the Children Federation Inc IZULLA, PRESTON; Adroitiz Consultants Limited, |
| <b>Primary Subject Heading</b>: | Global health                                                                                                                                                                                                                                        |
| Secondary Subject Heading:      | Health policy, Obstetrics and gynaecology                                                                                                                                                                                                            |
| Keywords:                       | Health policy < HEALTH SERVICES ADMINISTRATION & MANAGEMENT, Quality in health care < HEALTH SERVICES ADMINISTRATION & MANAGEMENT, Public health < INFECTIOUS DISEASES, Maternal medicine < OBSTETRICS, Community child health < PAEDIATRICS         |
|                                 |                                                                                                                                                                                                                                                      |

SCHOLARONE™  
Manuscripts



I, the Submitting Author has the right to grant and does grant on behalf of all authors of the Work (as defined in the below author licence), an exclusive licence and/or a non-exclusive licence for contributions from authors who are: i) UK Crown employees; ii) where BMJ has agreed a CC-BY licence shall apply, and/or iii) in accordance with the terms applicable for US Federal Government officers or employees acting as part of their official duties; on a worldwide, perpetual, irrevocable, royalty-free basis to BMJ Publishing Group Ltd ("BMJ") its licensees and where the relevant Journal is co-owned by BMJ to the co-owners of the Journal, to publish the Work in this journal and any other BMJ products and to exploit all rights, as set out in our [licence](#).

The Submitting Author accepts and understands that any supply made under these terms is made by BMJ to the Submitting Author unless you are acting as an employee on behalf of your employer or a postgraduate student of an affiliated institution which is paying any applicable article publishing charge ("APC") for Open Access articles. Where the Submitting Author wishes to make the Work available on an Open Access basis (and intends to pay the relevant APC), the terms of reuse of such Open Access shall be governed by a Creative Commons licence – details of these licences and which [Creative Commons](#) licence will apply to this Work are set out in our licence referred to above.

Other than as permitted in any relevant BMJ Author's Self Archiving Policies, I confirm this Work has not been accepted for publication elsewhere, is not being considered for publication elsewhere and does not duplicate material already published. I confirm all authors consent to publication of this Work and authorise the granting of this licence.

## Analysis

### On the road to universal coverage of postnatal care: Considerations for a targeted postnatal care approach for at-risk mother-baby dyads in low- and middle-income countries informed by a consultation with global experts

Muriuki, Angela<sup>1</sup>

Yahner, Melanie<sup>2</sup>

Kiragu, Michael<sup>3</sup>

De Graft-Johnson, Joseph<sup>2</sup>

Izulla, Preston<sup>3</sup>

<sup>1</sup> Formerly with Save the Children, Kenya (now independent consultant)

<sup>2</sup> Save the Children, United States

<sup>3</sup> Adroitiz Consultants Limited, Kenya

#### Correspondence to:

Full name: Melanie Yahner

Mailing address: Save the Children, US, 501 Kings Highway East, Fairfield, Connecticut US

Email: myahner@savechildren.org

Phone: +1 475 999 3011

Word count: 2,289

References: 20

#### KEY MESSAGES

- Efforts are needed to increase coverage of quality, timely postnatal care (PNC) to mother-baby dyads most at risk of poor health outcomes in the postnatal period while advancing progress toward universal coverage of quality PNC. A targeted PNC approach is one way of achieving this.
- Targeted community-based PNC approaches must be considered in tandem with and layered on complementary efforts aiming to strengthen the coverage, timing, and quality of facility PNC for all mother-baby dyads rather than as stand-alone

1  
2  
3  
4 interventions. This allows for timely identification and provision of care or referral  
5 for mother-baby dyads who develop complications without identifiable risk factors.  
6  
7

- 8  
9
- 10 ● Evidence-based clinical and non-clinical factors for use to assess risk should be  
11 selected based on key considerations including application to the context and  
12 feasibility of operationalization at the targeted service delivery point – facility and/or  
13 community.  
14
  - 15 ● Context-specific evidence is required to deepen insights into the feasibility and  
16 operationalizability of clinical and non-clinical risk factors in a real-world setting;  
17 capacity of the health system to support a targeted PNC approach while offering  
18 quality, timely PNC services for all mothers and their babies; and unintended  
19 consequences (both positive and negative) of a targeted PNC approach.  
20  
21  
22  
23  
24

25 26

27 28

## 28 **Contributors and sources**

29 The authors confirm contribution as follows:

30 **AM** contributed to the design and implementation of the expert consultation,  
31 conceptualization, secondary data analysis and manuscript writing. AM is a clinician,  
32 researcher and a public health expert with 15 years' experience in maternal, newborn and  
33 adolescent health.  
34

35 **MY** contributed to the design and implementation of the expert consultation,  
36 conceptualization, and manuscript writing. MY is a public health expert and researcher with  
37 expertise in adolescent and youth health including postnatal care for first time adolescent  
38 and young mothers.

39 **MK** contributed to the design and implementation of the expert consultative workshop, data  
40 analysis, and critical review and feedback. MK is a clinician, public health expert and  
41 researcher with 16 years' experience in research, evaluation and health policy.

42 **JJ** contributed to the design and implementation of the expert consultation,  
43 conceptualization of the manuscript and critical review and feedback. JJ is a clinician, public  
44 health expert and researcher with over 35 years' experience in maternal and newborn  
45 health.

46 **PI** contributed to the design and implementation of the expert consultative workshop, data  
47 analysis, and critical review and feedback. PI is a clinician, public health expert and  
48 researcher.



1  
2  
3 **49 Acknowledgements/Funding statement**

4  
5 50 Financial support for the research, authorship, and publication of this article was received  
6  
7 51 through a grant from the Bill & Melinda Gates Foundation [INV-010128]. The findings and  
8  
9 52 conclusions contained within are those of the authors and do not necessarily reflect positions  
10  
11 53 or policies of the Bill & Melinda Gates Foundation.

12  
13 **55 Patient involvement**

14 56 No patients were involved

15  
16  
17 **58 Conflicts of Interest**

18  
19 59 Having read and understood [BMJ policy on declaration of interests](#), the authors have no  
20  
21 60 conflict of interest to declare.

22  
23  
24 **62 Licence**

25  
26 63 The Corresponding Author has the right to grant on behalf of all authors and does grant on  
27  
28 64 behalf of all authors, an exclusive licence (or non-exclusive for government employees) on a  
29  
30 65 worldwide basis to the BMJ Publishing Group Ltd ("BMJ"), and its Licensees to permit this  
31  
32 66 article (if accepted) to be published in The BMJ's editions and any other BMJ products and  
33  
34 67 to exploit all subsidiary rights, as set out in [The BMJ's licence](#).

1  
2  
3 70 **Abstract:**

4 71 **Introduction:** The potential of timely, quality postnatal care (PNC) to reduce maternal and  
5 72 newborn mortality and to advance progress toward Universal Health Coverage (UHC) is well-  
6 73 documented. Yet, in many low- and middle-income countries, coverage of PNC remains low.  
7  
8 74 Risk-stratified approaches can maximize limited resources by targeting mother-baby dyads  
9 75 meeting the evidence-based risk criteria which predict poor postnatal outcomes.

10  
11 76 **Objectives:** To review evidence-based risk criteria for identification of at-risk mother-baby  
12 77 dyads, drawn from a literature review, and to identify key considerations for their use in a risk-  
13 78 stratified PNC approach.

14 79 **Design/setting/participants:** A virtual, semi-structured group discussion was conducted with  
15 80 maternal and newborn health experts on Zoom™. Participants were identified through  
16 81 purposive sampling based on content and context expertise.

17 82 **Results:** Seventeen experts, (5 male, 12 female), drawn from policymakers, implementing  
18 83 agencies and academia participated and surfaced several key themes. The identified risk  
19 84 factors are well-known, necessitating accelerated efforts to address underlying drivers of risk.  
20 85 Risk-stratified PNC approaches complement broader UHC efforts by providing an equity lens  
21 86 to identify the most vulnerable mother-baby dyads. However, these should be layered on  
22 87 efforts to strengthen PNC service provision for all mothers and newborns. Risk factors should  
23 88 comprise context-relevant, operationalizable, clinical and non-clinical factors. Even with rising  
24 89 coverage of facility delivery, targeted postnatal home visits still complement facility-based PNC.  
25 90 **Conclusion:** Risk-stratified PNC efforts must be considered within broader health systems  
26 91 strengthening efforts. Implementation research at the country level is needed understand  
27 92 feasibility and practicality of clinical and non-clinical risk factors and identify unintended  
28 93 consequences.  
29  
30  
31  
32  
33  
34  
35  
36  
37  
38  
39  
40  
41  
42  
43  
44  
45  
46  
47  
48  
49  
50  
51  
52  
53  
54  
55  
56  
57  
58  
59  
60

**Strengths and limitations of this study**

- A major strength of this study is the depth and breadth of expertise of the participants in PNC, each bringing a combination of clinical, research, policy, and implementation skills across multiple low-and-middle-income countries.
- The consultation brought together experts, many of whom had engaged in parallel discussions around the topic, with the aim of advancing consensus on the role of a targeted PNC approach, and the key considerations of such an approach.
- However, the consultation included a limited number of global experts and did not include mothers, service providers, or experts representing Ministries of Health or other government stakeholders as ultimate custodians of a targeted PNC approach.
- In addition, nearly all experts came from a clinical background, which shaped perspectives shared.
- The discussion platform did not allow for confidentiality, which could have led to social desirability bias.

1  
2  
3 95 **On the road to universal coverage of postnatal care: Considerations for a**  
4 **targeted postnatal care approach for at-risk mother-baby dyads in low- and**  
5 **96**  
6 **97**  
7 **98**  
8 **99**  
9  
10  
11  
12

13 100 *Angela Muriuki and colleagues argue that there is a critical role for targeted postnatal care*  
14 *(PNC) approaches that prioritise mother-baby dyads who are at risk of poorer outcomes in*  
15 *101*  
16 *102*  
17 *103*  
18 *104*  
19 *105*  
20 *106*  
21 *107*  
22 *108*  
23 *109*  
24 *110*  
25 *111*  
26 *112*  
27 *113*  
28 *114*  
29 *115*  
30 *116*  
31 *117*  
32 *118*  
33 *119*  
34 *120*  
35 *121*  
36 *122*  
37 *123*  
38 *124*  
39 *125*  
40 *126*  
41 *127*  
42 *128*  
43 *129*  
44 *130*  
45 *131*  
46 *132*  
47 *133*  
48 *134*  
49 *135*  
50 *136*  
51 *137*  
52 *138*  
53 *139*  
54 *140*  
55 *141*  
56 *142*  
57 *143*  
58 *144*  
59 *145*  
60 *146*

### 106 **Introduction**

107 Approximately 66% of maternal deaths and 75% of neonatal deaths occur within the first week  
108 after delivery.<sup>1</sup> WHO recommends postnatal care (PNC) at a facility, within 24 hours after birth,  
109 regardless of place of birth, observation within a facility for at least 24 hours after delivery, and  
110 early postnatal home visits (PNHVs) by community health workers (CHWs) to complement  
111 facility-based PNC.<sup>2</sup> Despite an increase in facility delivery, PNC coverage in many low- and  
112 middle-income countries (LMICs) remains below 50%.<sup>3</sup> In many LMICs, observation within a  
113 facility for 24 hours after delivery is challenging. This is in part due to pressure from families  
114 to leave after an uncomplicated delivery, lack of staffing and infrastructure for inpatient care,  
115 facility opening and closing times and a significant proportion of home deliveries.<sup>4,5</sup>

116 Evidence from LMICs with high newborn mortality rates demonstrates that early, quality  
117 PNHVs, within 72 hours after birth, can reduce newborn deaths by between 30-61% through  
118 support for healthy postnatal practices and early identification of danger signs and referral.<sup>6</sup>  
119 Yet high coverage of PNHVs is difficult to achieve in most LMICs, particularly due to limited  
120 coverage of CHW cadres.<sup>7</sup>

121 However, where adequate human resources are made available, evidence demonstrates  
122 benefit in identifying and providing risk-stratified PNHVs to mother-baby dyads.<sup>8</sup> Such an  
123 approach would identify and prioritize at-risk mother-baby dyads at the facility and at home for  
124 early PNHVs using evidence-informed criteria to identify those at risk of an adverse outcome.  
125 <sup>9,10</sup> Criteria can be clinical (e.g., medical conditions and complications) or nonclinical (e.g.  
126 sociodemographic, household, environmental factors). Using these criteria, health providers  
127 categorize mother-baby dyads based on risk and proactively create client-specific care  
128 plans.<sup>11</sup> A limited number of nascent program experiences have provided initial results and

1  
2  
3 129 lessons,<sup>12</sup> buttressed by a review of PNHV approaches that identified the need for “specifically  
4 130 targeting high-risk mothers and newborns for PNHVs, rather than using a ‘blanket approach’  
5 131 that attempts to reach all mothers and newborns”.<sup>13</sup> Yet the overall field lacks consensus  
6 132 around the need for a risk-stratified PNC approach, and the essential considerations for such  
7 133 an approach. Further, evidence from other fields of medicine has shown that a narrow focus  
8 134 using a risk-stratified approach could lead to unintended negative consequences including  
9 135 missing clients with no identifiable risk factors and potential for stigmatization.<sup>14,15</sup>

14  
15 136 To inform the development and implementation of a risk-stratified PNC approach in LMICs, an  
16 137 iterative scoping literature review to identify risk criteria and an expert consultation were  
17 138 conducted. This paper presents the findings and recommendations from the expert  
18 139 consultation; findings from the scoping review will be published separately.

## 140 **Methodology**

141 A team of maternal and newborn health (MNH) experts, selected for their PNC expertise and  
142 drawn from academia, implementation partners and donors, were invited for a facilitated virtual  
143 expert consultation in April 2021. The consultation aimed to:

- 144 1. Review key risk factors, drawn from the literature review, for use at service delivery  
145 point (facility, community) to identify at-risk mother-baby dyads.
- 146 2. Identify key considerations to prioritize risk factors and operationalize a risk-stratified  
147 PNC approach.

148 A discussion guide was developed in line with the two key objectives, pretested with an MNH  
149 expert who was not part of the consultation and used to facilitate the meeting. Discussion  
150 questions were high-level to encourage engagement:

- 151 1. In your experience, what are the major risk factors, both proximate and distal, that  
152 predict poor outcomes in the postnatal period for both mother and baby?
- 153 2. What key issues or considerations should be taken into account when selecting risk  
154 factors for use in a risk stratification approach in different contexts?

155 The consultation was held on Zoom™ for ninety minutes. Consent was sought from the  
156 participants to record the proceedings and use the recordings while ensuring that all  
157 participant information was de-identified. An inductive analysis process was used, and data  
158 were coded into emerging themes following transcription.

159

## 160 **Findings**

1  
2  
3 161 Sixteen MNH experts participated in the consultation. The discussion mainly explored key  
4 162 considerations for prioritization and operationalization. The findings are presented along the  
5 163 key themes that emerged during the discussion.

8  
9 164 **Risk factors identified from the literature review**

10 165 The risk factors identified from the iterative scoping literature review<sup>1</sup> (Textbox 1) were  
11 166 presented for the experts to reflect on and identify any additional factors based on their  
12 167 research and experience.

16  
17 **Textbox 1: Factors associated with poor outcomes for mothers and newborns in the**  
18 **postnatal period (full list is presented in the scoping review paper)**

19 Proximate factors include maternal age (<20, >35), primiparity and grand multiparity, shorter birth  
20 intervals, first order/rank neonates, male neonates, birth weight (smaller and larger than average),  
21 multiple gestation, previous history of death of child <5 years, and lack of or inadequate antenatal  
22 care  
23

24 Distant factors include low levels of parental education (lower than primary), parental employment  
25 (no employment or informal employment), rural residence, low household income, use of solid fuels  
26 and lack of clean water  
27  
28

29 168  
30 169 The risk factors presented have been known to the MNH community for decades. The  
31 170 participants raised the importance of strengthening initiatives that address and eliminate these  
32 171 risk factors in addition to applying them for screening purposes. Additionally, they identified  
33 172 the role of broader, emerging issues such as climate change, conflict, displacement, and  
34 173 disease outbreaks in aggravating the proximate and distant risk factors which puts a larger  
35 174 proportion of mother-baby dyads at risk.

39  
40  
41 175 **Key considerations for the operationalization of a risk-stratified PNC approach**

42 176 **a) Framing risk-stratified PNC approaches in the context of universal health coverage**

43  
44 177 Achieving universal health coverage (UHC) for PNC means providing quality, timely,  
45 178 accessible, equitable services for all mother-baby dyads, regardless of place of birth. Thus, it  
46 179 is critical to understand how a PNC approach that prioritises a sub-set of mothers and babies  
47 180 contributes to these aims. The journey towards achieving UHC is incremental and equity-  
48 181 focused, creating opportunities for risk-stratified PNC approaches that identify and prioritise  
49 182 those already facing poorer outcomes.

54  
55  
56  
57  
58 <sup>1</sup> The scoping review focused on population-based studies and excluded hospital-based studies and therefore  
59 the criteria identified were mainly non-clinical rather than the clinical risk factors traditionally used to screen for  
60 risk.

1  
2  
3 183 A risk-stratified PNC approach still requires a strengthened health system that can provide  
4 184 optimal PNC services, as the selected quotes in Textbox 2 illustrate. This includes  
5 185 strengthened provider capacity in PNC; adequate supply of essential medicines and  
6 186 equipment; strong referral systems including community follow-up; timely, reliable, quality data  
7 187 for risk screening; functional monitoring systems to assess functionality of the risk-stratified  
8 188 PNC approach and the provision of respectful, dignified care.

13 **Textbox 2: Selected quotes from participants on framing risk stratified approaches within**  
14 **the context of UHC**

17 *'we've been wondering whether focused approach and risk-stratified approach for the babies at*  
18 *most risk would be a more efficient way of doing it because our universal approach as you know,*  
19 *has been very challenging. It would be important to discuss this risk stratified approach but at the*  
20 *same time, you know balancing the universal approach, I think, somehow being able to do both will*  
21 *be important.'* **Participant 3, F**

25 *'If you are looking at this risk factor I go back to the skills. Do they know how to identify this woman*  
26 *who is at risk, do they know how to deal with a woman who is at risk?'* **Participant 15, F**

29 *'There are so many things that's tied to it [risk screening] like data to screen and to track morbidity*  
30 *and outcomes....and then the women's experience of care, and often that's forgotten....'*  
31 **Participant 12, F**

34 189

36 190 **b) Framing risk-stratified early PNHVs in the context of rising coverage of facility delivery**

39 191 A benefit of the risk-stratified PNC approach is to prioritise limited community-level resources  
40 192 towards early PNHVs for at-risk mother-baby dyads. The rising coverage of facility deliveries  
41 193 and the missed opportunities to provide quality early PNC at facility level raised questions on  
42 194 whether a community-based risk-stratified PNC approach is still relevant and if more emphasis  
43 195 should be placed on quality facility-level PNC.

48 196 Despite the rising global coverage of facility delivery, a significant proportion of mothers still  
49 197 deliver at home in many LMICs, and many are discharged before the recommended 24 hours.  
50 198 Again, some categories of at-risk mother-baby dyads such as adolescent mothers or mothers  
51 199 with small and sick newborns will still require PNHVs even with strengthened, quality PNC  
52 200 services at facility level. Textbox 3 provides select expert quotes that illustrate this point.

56 201

**Textbox 3: Selected quotes from participants on framing early postnatal home visits in the context of rising coverage of facility delivery.**

*'I think, personally, facility delivery is increasing and there are a lot of issues at facility level. I think, ideally, we should focus on improving the quality of services provided to mother and baby at facility level... increasingly I think what we really need is a strategy that addresses quality at the facility,'*

**Participant 1, M**

*"I think we are seeing more and more women deliver in the facility, but we are not seeing a reduction in [postnatal] mortality due to quality issues. If we could improve the quality of care during childbirth and have those who are at risk stay longer, we may see a return on investment in saving mothers' and newborns' lives,'* **Participant 14, F**

**c) Selection of type of risk factors to use in a screening approach**

203 There is value in including non-clinical risk factors in a screening approach. However, the  
204 challenges of their operationalization may be the reason why risk screening approaches have  
205 largely used clinical factors. For example, several of the factors identified are difficult to use  
206 for rapid screening at service delivery point by a health provider and could create stigma or  
207 embarrassment (e.g., household income). Some clinical risks can also be challenging to use  
208 in rapid screening (e.g., body mass index).

209 A tiered approach that begins with clinical risk factors, which are more acceptable and easier  
210 to use, and then includes the non-clinical risks could mitigate this challenge. Alternatively,  
211 selecting both clinical and non-clinical risks factors based on ease of use at service delivery  
212 level could address the challenge. Textbox 4 provides select quotes that illustrate this point.

**Textbox 4: Selected quotes from participants on selection of risk factors for use.**

*'And yes, I do agree that, in addition to the clinical aspects of the risk factor, also looking at the other determinants like socio-economic elements that put a baby at risk, I think, are important also to include. Again, balancing all of this, you know so that it's programmable—that is the biggest challenge,'* **Participant 3, F.**

*'May I suggest start with a clinical approach defined by context...,'* **Participant 13, M.**

*'I like that idea of a tiered approach because starting with all the factors including the socioeconomic ones can be very difficult, so the suggestion of a tiered approach would work well.'* **Participant 6, F.**

213



1  
2  
3 214 **d) Mitigating negative unintended consequences**  
4

5 215 Every pregnancy is a high-risk event. Many mothers and babies who develop complications  
6  
7 216 in the postnatal period lack identifiable risk factors, and a risk-stratified approach should also  
8  
9 217 rapidly identify and manage them. Risk-stratified PNC approaches must be nested within PNC  
10  
11 218 strengthening initiatives so that the broader system acts as the safety net that catches those  
12  
13 219 without identifiable risk factors and, thus, do not meet the screening criteria.

14 220 As one expert noted, improvements in overall quality and use of PNC by all women, including  
15  
16 221 those not identified as at-risk, have been seen in areas where risk-stratified PNC approaches  
17  
18 222 were used, highlighting the potential of a knock-on effect with implications for strengthening  
19  
20 223 PNC for all women. As illustrated by the selected quotes in Textbox 5, this points towards a  
21  
22 224 potential inherent risk mitigation factor that should be studied further.  
225

24 **Textbox 5: Selected quotes from participants on mitigating negative unintended  
25 consequences**

26  
27  
28 *'Certainly risk stratification is crucial and being able to identify moms and babies, who are more  
29 likely to have poor outcomes. I think we also know that sometimes those poor outcomes come from  
30 nowhere for both the mother and the baby. I feel like we need to consider also what a dual strategy  
31 is so that there's a specific strategy that deals with the mothers and babies who are more at risk  
32 and more likely to have those poor outcomes. And then, a broader based community strategy that  
33 can detect those issues that seem to come from nowhere for mothers and babies who don't appear  
34 to have any risk factors, but then subsequently develop significant issues,'* **Participant 10, F**

35  
36  
37  
38  
39  
40 *'What was found in one study is by initially concentrating on that risk stratification that indeed it led  
41 to improvements in PNC numbers, quality and content overall so you know again that kind of speaks  
42 to the theory of by concentrating on one aspect all boats rise...'* **Participant 6, F**  
43  
44

45 226

46 227 **Discussion**

47  
48 228 Timely and quality postnatal care is critical for mothers and newborns. Yet in LMICs, PNC  
49  
50 229 coverage remains stubbornly low<sup>16</sup> despite increased facility delivery. Prior risk stratification  
51  
52 230 efforts have sought to identify and prioritize at-risk mothers during pregnancy.<sup>17,18</sup> Yet limited  
53  
54 231 efforts have targeted at-risk mother-baby dyads during the postnatal period,<sup>19</sup> and little global  
55  
56 232 consensus around the need for a risk-stratified PNC approach, and the considerations for such  
57  
58 233 an approach, exists. Given the risk of stigma resulting from labelling mothers as “at-risk”, the  
59  
60 234 term “targeted PNC” may be more suitable for real-world application than “risk stratification”  
235 and is thus used throughout this discussion.

236

237 The expert consultation concluded that concurrent efforts are needed to target coverage of  
238 PNC to those most at risk of adverse outcomes, while improving quality of PNC to meet the  
239 increasing coverage of facility delivery. Through providing an equity lens to guide systematic  
240 identification of those most vulnerable to poor postnatal outcomes, targeted PNC should be  
241 considered a contribution—not an alternative—to UHC efforts. PNC approaches targeting  
242 those most at-risk of mortality in the postnatal period also contributes to the attainment of the  
243 3<sup>rd</sup> Sustainable Development Goal.

244

245 We suggest that targeted PNC can be advanced in parallel, and as a contribution, to UHC  
246 efforts. In the short term, community-based provider cadres must be sufficiently resourced and  
247 staffed to allow screening of all mother-baby dyads, adequate counselling on danger signs,  
248 timely identification and outreach to at-risk mother-baby dyads, and rapid identification and  
249 referral for those who later develop complications. In the medium term, universal coverage of  
250 PNHVs can only be achieved when CHW-to-household ratios are fully adequate, and  
251 transportation is available for CHWs to reach assigned households; this requires advocacy  
252 with government to deepen investments in CHWs. Targeted PNHVs would be phased out as  
253 an adequate CHW-to-household ratio is reached and blanket PNHV coverage can be  
254 achieved. Longer-term investments are needed to address gaps in physical infrastructure and  
255 human resources, as well as social challenges that limit use of facility-based services, degrade  
256 service quality, and discourage longer stays. Further, while ANC coverage is generally  
257 higher,<sup>20</sup> efforts to strengthen coverage and quality of ANC are needed in tandem to improve  
258 detection of at-risk mother-baby dyads and encourage continuity of care.

259

260 Targeted PNC should be considered and provided in the presence of certain conditions. First,  
261 targeted PNC is only appropriate in the context of efforts to strengthen the timing and quality  
262 of facility PNC, including pre-discharge PNC, for all mother-baby dyads. This allows for  
263 identification and timely service provision for those who develop complications even in the  
264 absence of identifiable risk factors. Second, monitoring systems must allow both timely  
265 identification of mother-baby dyads meeting established risk criteria, and proactive tracking,  
266 identification and resolution of any unintended consequences.

267

268 Implementing a targeted PNC approach nested within broader equity-based UHC efforts  
269 entails consideration of how limited resources can be most effectively and efficiently targeted  
270 to those most likely to benefit. Exploration of several key considerations through robust country  
271 learning agendas is needed. First, decisions of which mother-baby dyads should be targeted  
272 should be guided by identification of risk factors comprising both clinical and non-clinical

1  
2  
3 273 predictors of poor outcomes. Evidence-based risk criteria for both facility- and community-  
4 274 based providers must be determined with consideration of both contextual relevance and  
5 275 feasibility of operationalization.  
6  
7

8 276

9 277 Next are considerations of how to operationalize selected evidence-informed clinical and non-  
10 278 clinical risk factors by facility and community providers. The timing of risk identification merits  
11 279 further consideration (i.e., some factors may be identifiable during pregnancy, while others  
12 280 manifest only following delivery). Clear and feasible guidance on actions to be taken for  
13 281 mother-baby dyads meeting risk criteria is needed and must be developed with careful  
14 282 consideration of the implications for provider workload and motivation, client flow, and facility  
15 283 infrastructure capacity. Given the vulnerability of at-risk mother-baby dyads, particularly those  
16 284 with identified non-clinical risks, efforts to increase accessibility and ensure respectful care are  
17 285 particularly critical elements of broader UHC efforts. Unintended consequences—positive and  
18 286 negative impacts on the health system and on health outcomes—must be assessed,  
19 287 monitored continuously, and addressed in consultation with health workers and policymakers.  
20 288 Further, efforts are needed to gather perspectives of mothers, their families, and communities  
21 289 to understand the acceptability of a targeted PNC approach and to identify unintended  
22 290 consequences from clients' perspectives.  
23  
24

25 291

26 292 Notably, broader efforts are needed to reduce prevalence of underlying clinical and non-  
27 293 clinical risk factors that contribute to poor maternal and newborn outcomes. Mitigating the non-  
28 294 clinical risk factors will require a multi-sectoral effort beyond the health system.  
29  
30

31 295

32 296 This consultation has several limitations. The expert consultation invited perspectives of a  
33 297 small number of global and country experts. While the format facilitated robust engagement  
34 298 of experts with deep and diverse expertise in the subject matter, and involvement in strategy  
35 299 and policy from the organizational to global levels, findings represent the perspectives of a  
36 300 small and targeted sample. While care was taken to ensure diversity of experts' sex,  
37 301 organisation affiliation, and country of origin, perspectives of other relevant stakeholders are  
38 302 not represented. Notably, all experts came from a clinical background, which shaped  
39 303 perspectives shared. The discussion explored high-level policy considerations, and did not  
40 304 explore acceptability of targeted PNC from the perspectives of mothers, families, or health  
41 305 workers. The discussion did not allow for confidentiality, which could have led to social  
42 306 desirability bias.  
43  
44  
45  
46  
47  
48  
49  
50  
51  
52  
53  
54  
55  
56

57 307 **Conclusion**  
58  
59  
60

1  
2  
3 308 Targeted community-based PNC approaches, nested within broader efforts to strengthen  
4 309 quality PNC services including pre-discharge PNC, could improve outcomes for mother-baby  
5 310 dyads most at-risk of morbidity and mortality during the postnatal period.  
6  
7

8 311

9  
10 312 **References**  
11

- 
- 12  
13 <sup>1</sup> World Health Organization. Postnatal care of the mother and newborn [Internet]. Geneva; 2013. Available  
14 from: [http://apps.who.int/iris/bitstream/10665/97603/1/9789241506649\\_eng.pdf](http://apps.who.int/iris/bitstream/10665/97603/1/9789241506649_eng.pdf).  
15 <sup>2</sup> World Health Organization. Postnatal care of the mother and newborn [Internet]. Geneva; 2013. Available  
16 from: [http://apps.who.int/iris/bitstream/10665/97603/1/9789241506649\\_eng.pdf](http://apps.who.int/iris/bitstream/10665/97603/1/9789241506649_eng.pdf).  
17 <sup>3</sup> Victora, CG, Requejo, JH, Barros, AJD, Berman, P, Bhutta, Z, Boerma T. Countdown to 2015: a decade of  
18 tracking progress for maternal, newborn, and child survival. *Lancet, The*. 2016;387(10032):1049–59.  
19 <sup>4</sup> Bashar Mda, Aggarwal A, Pilania M. Factors causing early maternity discharge of uncomplicated normal  
20 delivery cases at government health facilities in Northern India: An exploratory study. *J Educ Health*  
21 *Promot [Internet]*. 2020;9(1):198. Available from:  
22 <http://www.jehp.net/text.asp?2020/9/1/198/293940>  
23 <sup>5</sup> Campbell OMR, Cegolon L, Macleod D, Benova L. Length of Stay After Childbirth in 92 Countries and  
24 Associated Factors in 30 Low- and Middle-Income Countries: Compilation of Reported Data and a Cross-  
25 sectional Analysis from Nationally Representative Surveys. Myers JE, editor. *PLOS Med [Internet]*. 2016  
26 Mar 8;13(3):e1001972. Available from: <https://dx.plos.org/10.1371/journal.pmed.1001972>  
27 <sup>6</sup> Gogia S, Sachdev HS. Home visits by community health workers to prevent neonatal deaths in developing  
28 countries: a systematic review. *Bull World Health Organ [Internet]*. 2010 Sep 1;88(9):658-666B. Available  
29 from: <http://www.who.int/bulletin/volumes/88/9/09-069369.pdf>  
30 <sup>7</sup> Lassi ZS, Das JK, Salam, RA et al. Evidence from community level inputs to improve quality of care for  
31 maternal and newborn health: interventions and findings. *Reprod Health*. 2014. 11, S2.  
32 <https://doi.org/10.1186/1742-4755-11-S2-S2>  
33 <sup>8</sup> McPherson R, Hodgins S. Postnatal home visitation: Lessons from country programs operating at scale. *J*  
34 *Glob Health [Internet]*. 2018 Jun;8(1). Available from: [http://jogh.org/documents/issue201801/jogh-](http://jogh.org/documents/issue201801/jogh-08-010422.pdf)  
35 [08-010422.pdf](http://jogh.org/documents/issue201801/jogh-08-010422.pdf)  
36 <sup>9</sup> World Health Organization (WHO). Risk approach for maternal and child health care. In: *World Health*  
37 *Forum*. 1981. p. 413–22.  
38 <sup>10</sup> Ochejele S, Ijiko E, Obulu M. Assessment of the risk approach in the reduction of maternal mortality in  
39 north-central Nigeria. *J West African Coll Surg [Internet]*. 2011;1(2):76–85. Available from:  
40 <http://www.ncbi.nlm.nih.gov/pubmed/25452955> <http://www.pubmedcentral.nih.gov/articlerend>  
41 [er.fcgi?artid=PMC4170261](http://www.ncbi.nlm.nih.gov/pubmed/25452955)  
42 <sup>11</sup> Mora J, Iturralde MD, Prieto L, Domingo C, Gagnon M-P, Martínez-Carazo C, et al. Key aspects related to  
43 implementation of risk stratification in health care systems-the ASSEHS study. *BMC Health Serv Res*  
44 *[Internet]*. 2017 Dec 5;17(1):331. Available from:  
45 <http://bmchealthservres.biomedcentral.com/articles/10.1186/s12913-017-2275-3>  
46 <sup>12</sup> Maternal and Child Survival Program. Risk Stratification for Prioritized Postnatal Care in Rural India:  
47 An innovative approach for improving quality of care for mothers and newborns. 2020. Unpublished  
48 technical brief.  
49 <sup>13</sup> Hodgins S, McPherson R, Kerber K. Postnatal Care, with a Focus on Home Visitation: A Design Decision-  
50 Aid for Policymakers and Program Managers. Maternal and Child Survival Program. Available from:  
51 [https://www.healthynewbornnetwork.org/hnn-](https://www.healthynewbornnetwork.org/hnn-content/uploads/PostnatalCarewithaFocusonHomeVisitation.pdf)  
52 [content/uploads/PostnatalCarewithaFocusonHomeVisitation.pdf](https://www.healthynewbornnetwork.org/hnn-content/uploads/PostnatalCarewithaFocusonHomeVisitation.pdf)  
53 <sup>14</sup> Garg A, Boynton-Jarrett R, Dworkin PH. Avoiding the unintended consequences of screening for social  
54 determinants of health. *JAMA - J Am Med Assoc*. 2016;316(8):813–4.  
55  
56  
57  
58  
59  
60

- 1  
2  
3  
4  
5  
6  
7  
8  
9  
10  
11  
12  
13  
14  
15  
16  
17  
18  
19  
20  
21  
22  
23  
24  
25  
26  
27  
28  
29  
30  
31  
32  
33  
34  
35  
36  
37  
38  
39  
40  
41  
42  
43  
44  
45  
46  
47  
48  
49  
50  
51  
52  
53  
54  
55  
56  
57  
58  
59  
60
- 
- <sup>15</sup> Feudtner C, Schall T, Nathanson P, Berry J. Ethical Framework for Risk Stratification and Mitigation Programs for Children With Medical Complexity. *Pediatrics* [Internet]. 2018 Mar 1;141(Supplement 3):S250–8. Available from: <http://pediatrics.aappublications.org/lookup/doi/10.1542/peds.2017-1284J>
- <sup>16</sup> Victora, CG, Requejo, JH, Barros, AJD, Berman, P, Bhutta, Z, Boerma T. Countdown to 2015: a decade of tracking progress for maternal, newborn, and child survival. *Lancet, The*. 2016;387(10032):1049–59.
- <sup>17</sup> Patel A, Prakash AA, Pusdekar Y V., Kulkarni H, Hibberd P. Detection and risk stratification of women at high risk of preterm birth in rural communities near Nagpur, India. *BMC Pregnancy Childbirth*. 2017;17(1).
- <sup>18</sup> Ochejele S, Ijiko E, Obulu M. Assessment of the risk approach in the reduction of maternal mortality in north-central Nigeria. *J West African Coll Surg* [Internet]. 2011;1(2):76–85. Available from: <http://www.ncbi.nlm.nih.gov/pubmed/25452955><http://www.pubmedcentral.nih.gov/articlerender.fcgi?artid=PMC4170261>
- <sup>19</sup> World Health Organization. Postnatal care of the mother and newborn [Internet]. Geneva; 2013. Available from: [http://apps.who.int/iris/bitstream/10665/97603/1/9789241506649\\_eng.pdf](http://apps.who.int/iris/bitstream/10665/97603/1/9789241506649_eng.pdf).
- <sup>20</sup> Benova L, Tunçalp Ö, Moran AC, Campbell OMR. Not just a number: examining coverage and content of antenatal care in low-income and middle-income countries. *BMJ Global Health* 2018;3:e000779.

## Standards for Reporting Qualitative Research (SRQR)\*

<http://www.equator-network.org/reporting-guidelines/srqr/>

Page/line no(s).

### Title and abstract

|                                                                                                                                                                                                                                                              |                                         |
|--------------------------------------------------------------------------------------------------------------------------------------------------------------------------------------------------------------------------------------------------------------|-----------------------------------------|
| <p><b>Title</b> - Concise description of the nature and topic of the study Identifying the study as qualitative or indicating the approach (e.g., ethnography, grounded theory) or data collection methods (e.g., interview, focus group) is recommended</p> | <p>Page 1/Line 4<br/>Page 6/Line 96</p> |
| <p><b>Abstract</b> - Summary of key elements of the study using the abstract format of the intended publication; typically includes background, purpose, methods, results, and conclusions</p>                                                               | <p>Page 4/Line 70</p>                   |

### Introduction

|                                                                                                                                                                     |                        |
|---------------------------------------------------------------------------------------------------------------------------------------------------------------------|------------------------|
| <p><b>Problem formulation</b> - Description and significance of the problem/phenomenon studied; review of relevant theory and empirical work; problem statement</p> | <p>Page 7/Line 132</p> |
| <p><b>Purpose or research question</b> - Purpose of the study and specific objectives or questions</p>                                                              | <p>Page 7/Line 137</p> |

### Methods

|                                                                                                                                                                                                                                                                                                                                                                                                             |                                            |
|-------------------------------------------------------------------------------------------------------------------------------------------------------------------------------------------------------------------------------------------------------------------------------------------------------------------------------------------------------------------------------------------------------------|--------------------------------------------|
| <p><b>Qualitative approach and research paradigm</b> - Qualitative approach (e.g., ethnography, grounded theory, case study, phenomenology, narrative research) and guiding theory if appropriate; identifying the research paradigm (e.g., postpositivist, constructivist/ interpretivist) is also recommended; rationale**</p>                                                                            | <p>Page 7/Line 142</p>                     |
| <p><b>Researcher characteristics and reflexivity</b> - Researchers' characteristics that may influence the research, including personal attributes, qualifications/experience, relationship with participants, assumptions, and/or presuppositions; potential or actual interaction between researchers' characteristics and the research questions, approach, methods, results, and/or transferability</p> | <p>Page 7/Line 142<br/>Page 7/Line 149</p> |
| <p><b>Context</b> - Setting/site and salient contextual factors; rationale**</p>                                                                                                                                                                                                                                                                                                                            | <p>Page 6/Line 108</p>                     |
| <p><b>Sampling strategy</b> - How and why research participants, documents, or events were selected; criteria for deciding when no further sampling was necessary (e.g., sampling saturation); rationale**</p>                                                                                                                                                                                              | <p>Page 7/Line 142</p>                     |
| <p><b>Ethical issues pertaining to human subjects</b> - Documentation of approval by an appropriate ethics review board and participant consent, or explanation for lack thereof; other confidentiality and data security issues</p>                                                                                                                                                                        | <p>Page 7/Line 156</p>                     |
| <p><b>Data collection methods</b> - Types of data collected; details of data collection procedures including (as appropriate) start and stop dates of data collection and analysis, iterative process, triangulation of sources/methods, and modification of procedures in response to evolving study findings; rationale**</p>                                                                             | <p>Page 7/Line 142</p>                     |

|                            |                                                                                                                                                                                                                                                       |                 |
|----------------------------|-------------------------------------------------------------------------------------------------------------------------------------------------------------------------------------------------------------------------------------------------------|-----------------|
| 1<br>2<br>3<br>4<br>5<br>6 | <b>Data collection instruments and technologies</b> - Description of instruments (e.g., interview guides, questionnaires) and devices (e.g., audio recorders) used for data collection; if/how the instrument(s) changed over the course of the study | Page 7/Line 149 |
| 7<br>8<br>9                | <b>Units of study</b> - Number and relevant characteristics of participants, documents, or events included in the study; level of participation (could be reported in results)                                                                        | Page 8/Line 162 |
| 10<br>11<br>12<br>13       | <b>Data processing</b> - Methods for processing data prior to and during analysis, including transcription, data entry, data management and security, verification of data integrity, data coding, and anonymization/de-identification of excerpts    | Page 7/Line 158 |
| 14<br>15<br>16<br>17       | <b>Data analysis</b> - Process by which inferences, themes, etc., were identified and developed, including the researchers involved in data analysis; usually references a specific paradigm or approach; rationale**                                 | Page 7/Line 158 |
| 18<br>19<br>20<br>21       | <b>Techniques to enhance trustworthiness</b> - Techniques to enhance trustworthiness and credibility of data analysis (e.g., member checking, audit trail, triangulation); rationale**                                                                | n/a             |

### Results/findings

|                                              |                                                                                                                                                                                                   |                                                                |
|----------------------------------------------|---------------------------------------------------------------------------------------------------------------------------------------------------------------------------------------------------|----------------------------------------------------------------|
| 24<br>25<br>26<br>27                         | <b>Synthesis and interpretation</b> - Main findings (e.g., interpretations, inferences, and themes); might include development of a theory or model, or integration with prior research or theory | Page 8/Line 176                                                |
| 28<br>29<br>30<br>31<br>32<br>33<br>34<br>35 | <b>Links to empirical data</b> - Evidence (e.g., quotes, field notes, text excerpts, photographs) to substantiate analytic findings                                                               | Page 9/Textbox 2<br>Page 10/Textboxes 3-4<br>Page 11/Textbox 5 |

### Discussion

|                                        |                                                                                                                                                                                                                                                                                                                                                                                                             |                  |
|----------------------------------------|-------------------------------------------------------------------------------------------------------------------------------------------------------------------------------------------------------------------------------------------------------------------------------------------------------------------------------------------------------------------------------------------------------------|------------------|
| 38<br>39<br>40<br>41<br>42<br>43<br>44 | <b>Integration with prior work, implications, transferability, and contribution(s) to the field</b> - Short summary of main findings; explanation of how findings and conclusions connect to, support, elaborate on, or challenge conclusions of earlier scholarship; discussion of scope of application/generalizability; identification of unique contribution(s) to scholarship in a discipline or field | Page 11/Line 228 |
| 45<br>46                               | <b>Limitations</b> - Trustworthiness and limitations of findings                                                                                                                                                                                                                                                                                                                                            | Page 13/Line 296 |

### Other

|                |                                                                                                                                               |                |
|----------------|-----------------------------------------------------------------------------------------------------------------------------------------------|----------------|
| 49<br>50<br>51 | <b>Conflicts of interest</b> - Potential sources of influence or perceived influence on study conduct and conclusions; how these were managed | Page 3/Line 58 |
| 52<br>53<br>54 | <b>Funding</b> - Sources of funding and other support; role of funders in data collection, interpretation, and reporting                      | Page 3/Line 49 |

1  
2  
3  
4  
5  
6  
7  
8  
9  
10  
11  
12  
13  
14  
15  
16  
17  
18  
19  
20  
21  
22  
23  
24  
25  
26  
27  
28  
29  
30  
31  
32  
33  
34  
35  
36  
37  
38  
39  
40  
41  
42  
43  
44  
45  
46  
47  
48  
49  
50  
51  
52  
53  
54  
55  
56  
57  
58  
59  
60

\*The authors created the SRQR by searching the literature to identify guidelines, reporting standards, and critical appraisal criteria for qualitative research; reviewing the reference lists of retrieved sources; and contacting experts to gain feedback. The SRQR aims to improve the transparency of all aspects of qualitative research by providing clear standards for reporting qualitative research.

\*\*The rationale should briefly discuss the justification for choosing that theory, approach, method, or technique rather than other options available, the assumptions and limitations implicit in those choices, and how those choices influence study conclusions and transferability. As appropriate, the rationale for several items might be discussed together.

**Reference:**

O'Brien BC, Harris IB, Beckman TJ, Reed DA, Cook DA. **Standards for reporting qualitative research: a synthesis of recommendations.** *Academic Medicine*, Vol. 89, No. 9 / Sept 2014  
DOI: [10.1097/ACM.0000000000000388](https://doi.org/10.1097/ACM.0000000000000388)
